# Supplementary material for: Prenatal marijuana exposure and neonatal outcomes: a retrospective cohort study
Source: HighWire-hosted journal article supplement (doi:10.1136/bmjopen-2022-061167), 2022-09-01
Supplement: bmjopen-2022-061167supp001_data_supplement.pdf [file bmjopen-2022-061167supp001_data_supplement.pdf]

Presence of other drugs in meconium screen by THC status, n=1,703

|                                                                                     | <b>All patients,<br/>n=1,703</b> | <b>THC negative,<br/>N=1,175</b> | <b>THC positive<br/>N=528</b> | <b>p-value</b> |
|-------------------------------------------------------------------------------------|----------------------------------|----------------------------------|-------------------------------|----------------|
| <b>Presence of one or more drugs<br/>(besides THC) in meconium screen,<br/>n(%)</b> | 163(9.6%)                        | 118(10.0%)                       | 45(8.5%)                      | 0.324          |
| <b>Presence of drugs in meconium<br/>screen, n(%)</b>                               |                                  |                                  |                               |                |
| Methamphetamines                                                                    | 84(4.9%)                         | 60(5.1%)                         | 24(4.6%)                      | 0.621          |
| Amphetamines                                                                        | 102(6.0%)                        | 72(6.1%)                         | 30(5.7%)                      | 0.720          |
| Barbiturates                                                                        | 1(0.1%)                          | 1(0.1%)                          | 0(0.0%)                       | 0.503          |
| Cocaine                                                                             | 4(0.2%)                          | 2(0.2%)                          | 2(0.4%)                       | 0.411          |
| Opiates                                                                             | 51(3.0%)                         | 38(3.2%)                         | 13(2.5%)                      | 0.387          |
| Oxycodone                                                                           | 6(0.4%)                          | 4(0.3%)                          | 2(0.4%)                       | 0.902          |
| Phencyclidine                                                                       | 0(0.0%)                          | 0(0.0%)                          | 0(0.0%)                       | NA             |
| Methadone                                                                           | 29(1.7%)                         | 24(2.0%)                         | 5(1.0%)                       | 0.106          |
| Propoxyphene                                                                        | 0(0.0%)                          | 0(0.0%)                          | 0(0.0%)                       | NA             |
| Benzodiazepines                                                                     | 0(0.0%)                          | 0(0.0%)                          | 0(0.0%)                       | NA             |
